# Supplementary material
Source: Royal Society of Chemistry journal article supplement (doi:10.1039/d5tc04538j)
Supplement: d5tc04538j1.pdf [file d5tc04538j1.pdf]

## Supporting Information

### Sustainable upcycling of waste low-density polyethylene droppers into active materials for lithium-ion hybrid capacitors

Kiran Kumar Garlapati <sup>a</sup>, Indranil Bhattacharya <sup>b</sup>, Samikshya Sahoo <sup>b</sup>, Bharat B. Panigrahi <sup>c,\*</sup>,  
Surendra K. Martha <sup>b,\*</sup>

<sup>a</sup> Center for Interdisciplinary Programs, Indian Institute of Technology Hyderabad, Kandi,  
Sangareddy, 502284, Telangana, India

<sup>b</sup> Department of Chemistry, Indian Institute of Technology Hyderabad, Kandi, Sangareddy,  
502284, Telangana, India

<sup>c</sup> Department of Materials Science and Engineering, Indian Institute of Technology Hyderabad,  
Kandi, Sangareddy, 502284, Telangana, India

\*Corresponding authors: [bharat@msme.iith.ac.in](mailto:bharat@msme.iith.ac.in) (B. B. Panigrahi) and [martha@chy.iith.ac.in](mailto:martha@chy.iith.ac.in)  
(S. K. Martha)

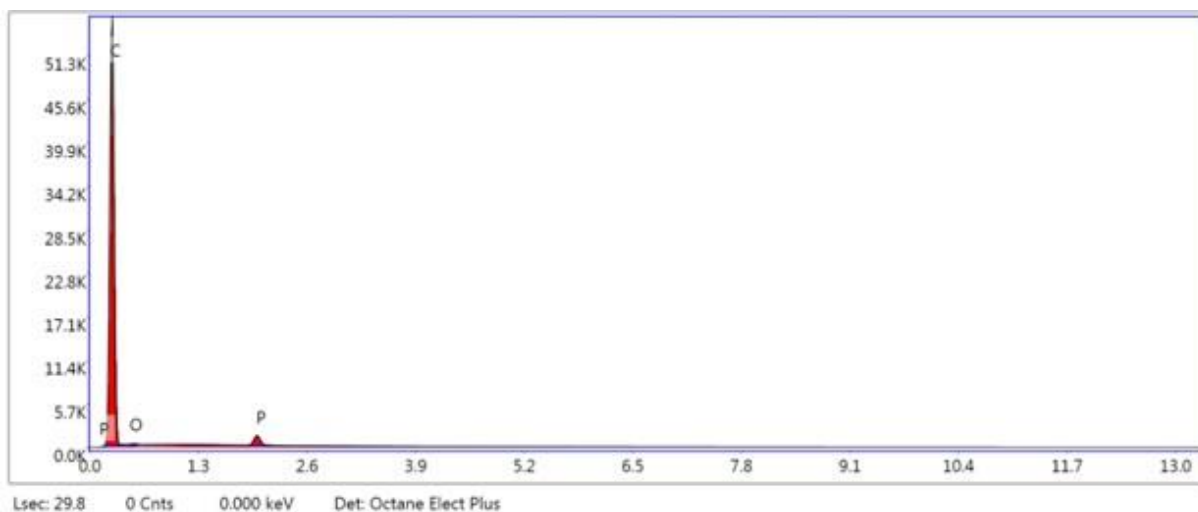

Figure S1. EDS spectrum of LDPE-PHC.

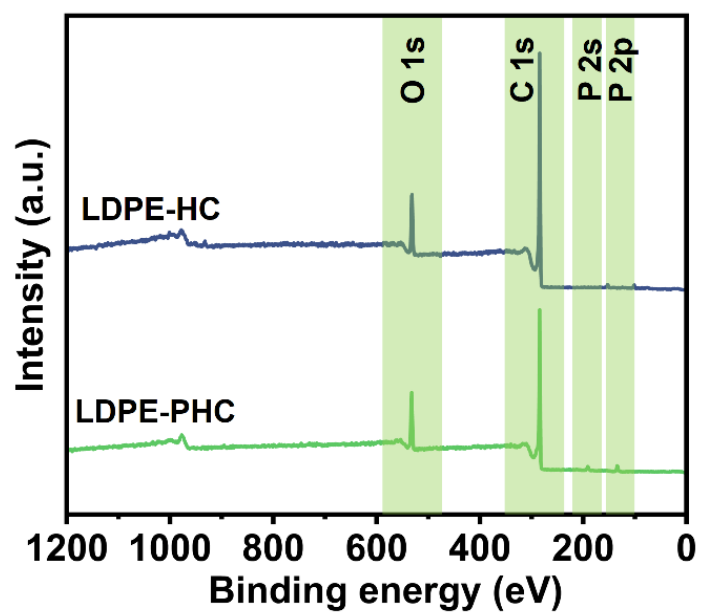

Figure S2. XPS survey spectra of LDPE-HC and LDPE-PHC.

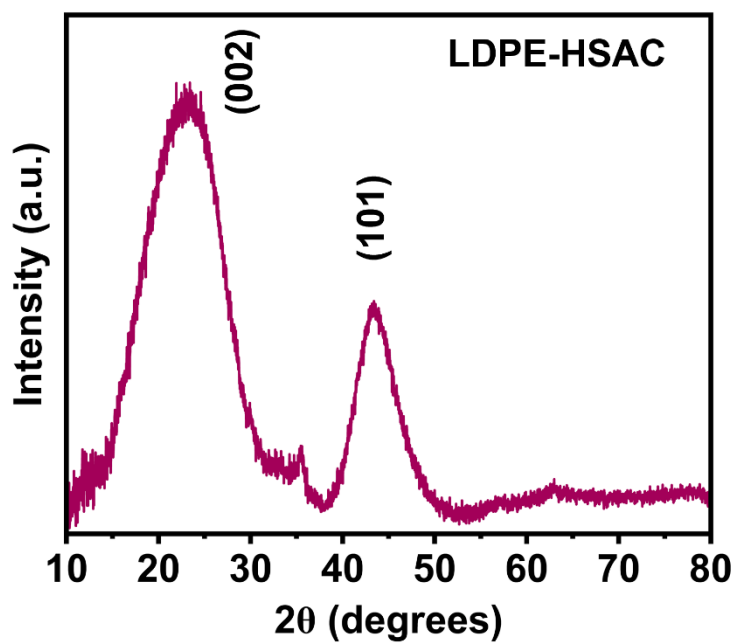

Figure S3. XRD of LDPE HSAC.

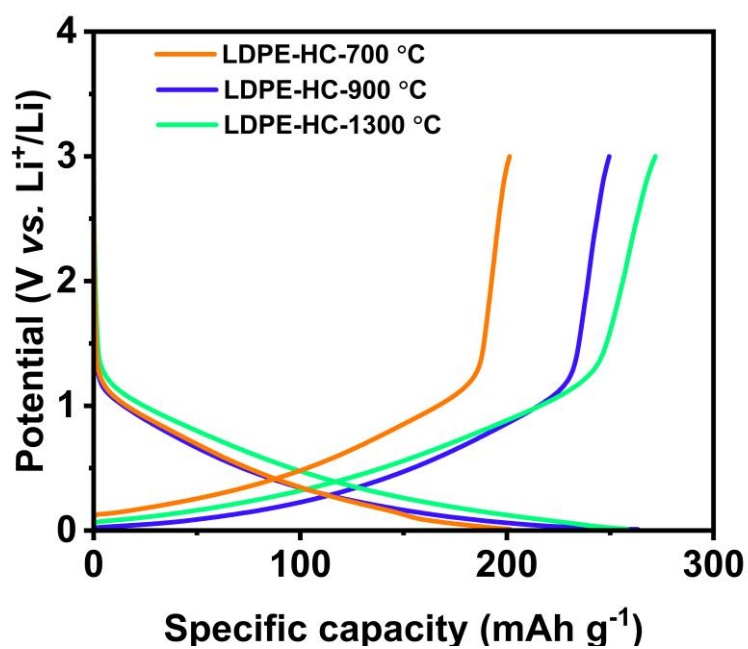

Figure S4. Second cycle GCD plots of LDPE-HC synthesised at 700 °C, 900 °C and 1300 °C.

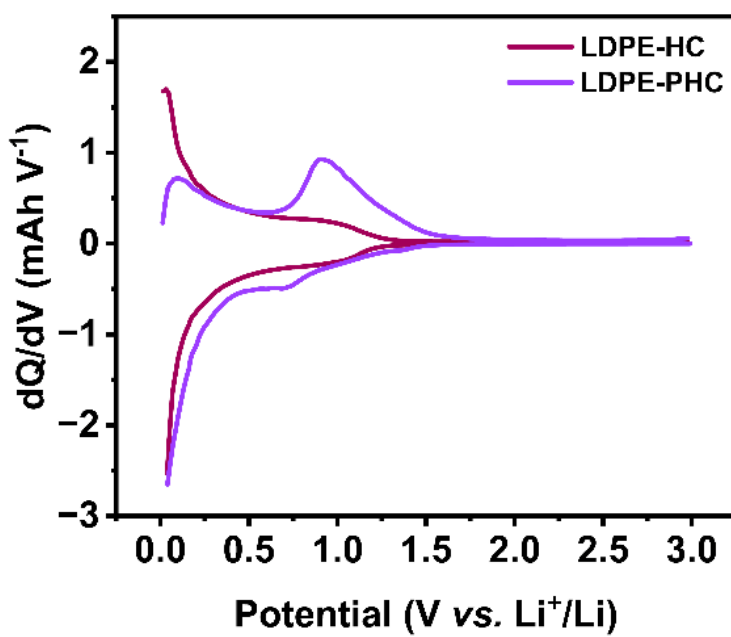

Figure S5. Differential capacity plots of LDPE-HC and LDPE-PHC.

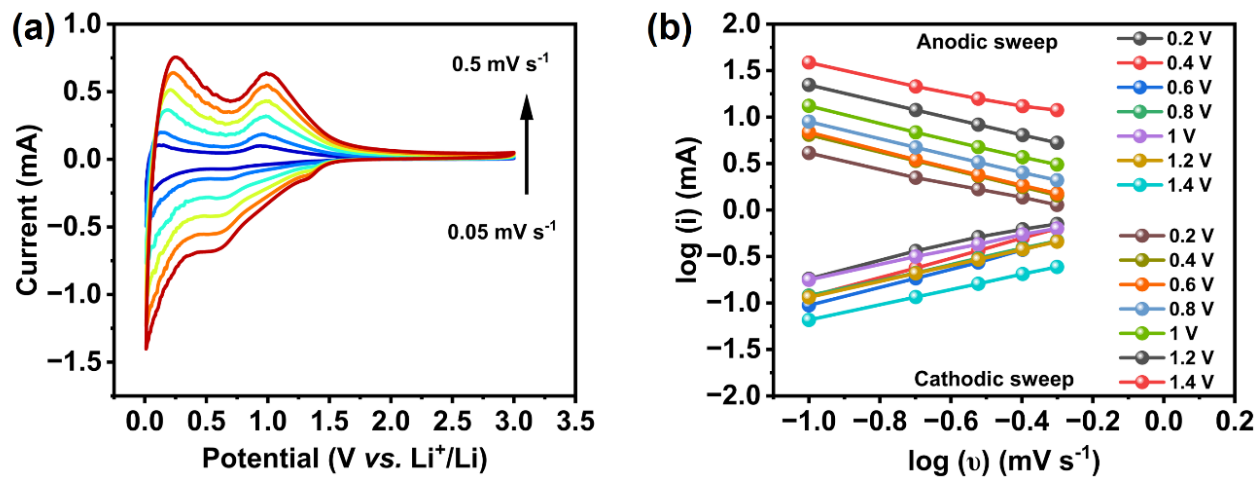

Figure S6. (a) CVs of LDPE-PHC at various scan rates (0.05, 0.1, 0.2, 0.3, 0.4 and 0.5  $\text{mV s}^{-1}$ ). (b)  $\log(v)$  and  $\log(i)$  plots at different voltages for b-value analysis.

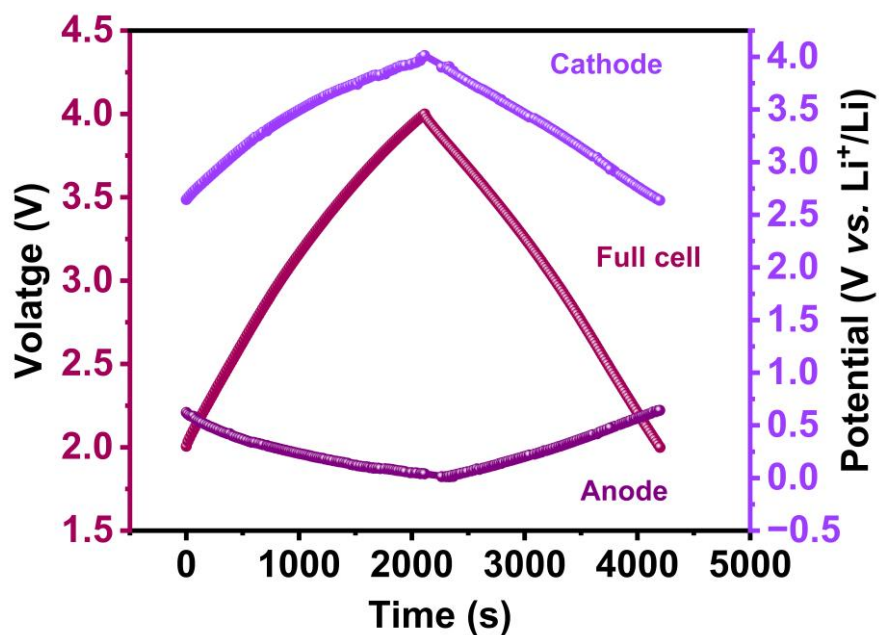

Figure S7. GCD three-electrode analysis of the LIC full cell and the individual anodic and cathodic potentials.

Table T1. Comparison of LDPE-PHC||LDPE-HSAC LIC performance metrics of existing literature.

| LIC configuration                                                                                                   | Voltage window(V) | Energy density (Wh kg <sup>-1</sup> ) | Power density (kW kg <sup>-1</sup> ) | Cyclic stability                             |
|---------------------------------------------------------------------------------------------------------------------|-------------------|---------------------------------------|--------------------------------------|----------------------------------------------|
| Li <sub>4</sub> Ti <sub>5</sub> O <sub>12</sub>   LiNi <sub>0.5</sub> Mn <sub>1.5</sub> O <sub>4</sub> <sup>1</sup> | 1.5-3.5           | 48                                    | 7.9                                  | 70% for 4000 cycles                          |
| Bio-waste carbon anode and activated carbon cathode <sup>2</sup>                                                    | 1.5-4             | 120                                   | 20.7                                 | 67% for 9000 cycles                          |
| TiO <sub>2-x</sub> -C  activated carbon <sup>3</sup>                                                                | 1-4               | 77.6                                  | 0.25                                 | 54.3% for 1000 cycles                        |
| Graphite-Si  Activated carbon <sup>4</sup>                                                                          | 2-4               | 91.9                                  | 0.03                                 | 87.2% for 1000 cycles                        |
| Hard carbon-Graphite-Si composite anode  Activated carbon <sup>5</sup>                                              | 2-4               | 129.3                                 | 6.8                                  | 88.4% for 1000 cycles                        |
| CNT/rGOR symmetric device <sup>6</sup>                                                                              | 0.1-4.5           | 213                                   | 0.45                                 | 87.1% for 1000 cycles                        |
| Holey Ti <sub>3</sub> C <sub>2</sub>   Activated carbon <sup>7</sup>                                                | 0.1-4.2           | 110                                   | 4.6                                  | 80% for 2000 cycles                          |
| B/N/O-Codoped 2D Porous Carbon Nanosheets symmetric device <sup>8</sup>                                             | 0.01-4.5          | 173.1                                 | 0.22                                 | 79% for 1000 cycles                          |
| LDPE-PHC  LDPE-HSAC                                                                                                 | 2-4               | 115.9                                 | 6                                    | 85.8% for 7000 cycles at 1 A g <sup>-1</sup> |

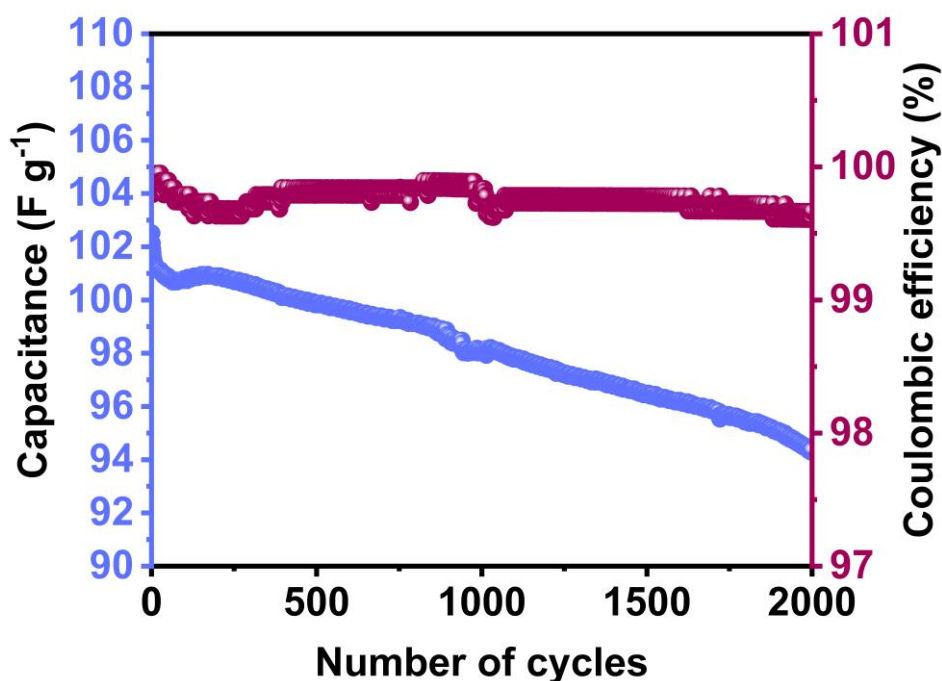

Figure S8. Discharge capacity and coulombic efficiency of LDPE-PHC||LDPE-HSAC at high temperature of 50 °C.

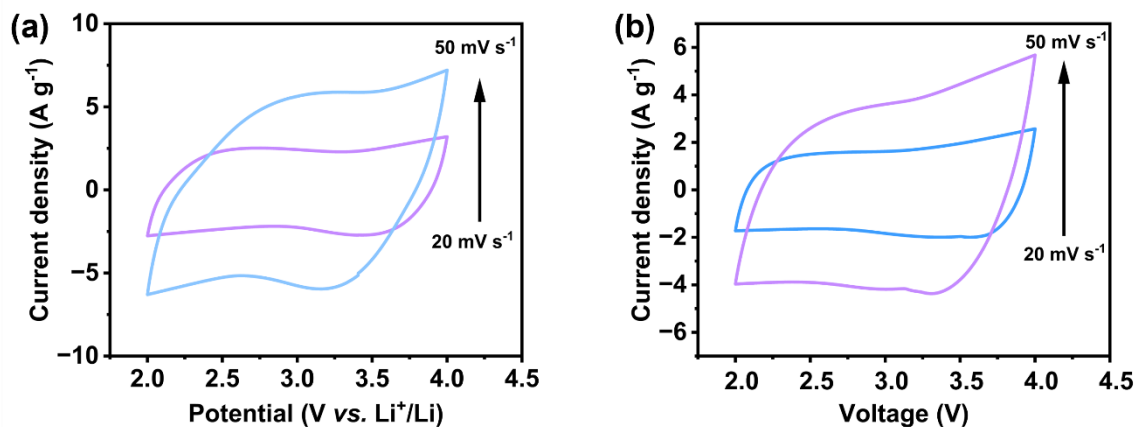

Figure S9. CVs of (a) LDPE-HSAC and (b) LDPE-PHC||LDPE-HSAC at 20 and 50 mV s<sup>-1</sup>.

#### References:

- 1 S. Bhowmik, U. Bhattacharjee, S. Ghosh and S. K. Martha, *J Energy Storage*, 2023, 73, 109099.
- 2 U. Bhattacharjee, A. Gautam and S. K. Martha, *Electrochim Acta*, 2023, 454, 142353.
- 3 J. Huo, Y. Xiao, H. Yang, G. Yue, Y. Fang and S. Guo, *J Energy Storage*, 2024, 89, 111586.

- 4 C. J. Chng, Y. Abe and S. Kumagai, *Advanced Energy and Sustainability Research*, 2025, 6, 2400238.
- 5 C. J. Chng, Y. Abe and S. Kumagai, *J Power Sources*, 2025, 642, 236930.
- 6 T. Liu, N. Chen, H. Li, J. Liu, R. Wang, H. Chen, X. Gao, L. Guo and Y. Bai, *ACS Appl Energy Mater*, 2025, 8, 6914–6924.
- 7 H. Y. Zhou, L. W. Lin, Z. Y. Sui, H. Y. Wang and B. H. Han, *ACS Appl Mater Interfaces*, 2023, 15, 12161–12170.
- 8 J. Lin, Y. H. Shi, Y. F. Li, Y. H. Song, X. L. Wu and H. Z. Sun, *ACS Appl Energy Mater*, 2023, 6, 8867–8874.
